# Supplementary material for: Highly photostable and biocompatible graphene oxides with amino acid functionalities
Source: Royal Society of Chemistry journal article supplement (doi:10.1039/c4tc00589a), 2014-06-27
Supplement: c4tc00589a1.pdf [file c4tc00589a1.pdf]

## Supplementary Information

### **Highly photostable and biocompatible graphene oxides with amino acid functionality**

**Houjuan Zhu,<sup>‡,a,b</sup> Yajun Zhang,<sup>‡,d</sup> Lulu Zhang,<sup>a,b</sup> Tao Yu,<sup>c</sup> Kui Zhang,<sup>a</sup> Hui Jiang,<sup>c</sup> Lijun Wu,<sup>a,d \*</sup> and Suhua Wang<sup>a,b \*</sup>**

<sup>a</sup>Department of Chemistry, University of Science & Technology of China, Hefei, Anhui, 230026, China.

<sup>b</sup>Institute of Intelligent Machines, Chinese Academy of Sciences, Hefei, Anhui, 230031, China.

<sup>c</sup>Beijing Institute of Pharmaceutical Chemistry, State Key Laboratory of NBC Protection for Civilian, Beijing, 102205, P. R. China.

<sup>d</sup>Institute of Technical biology & Agriculture Engineering, Chinese Academy of Sciences, Hefei, Anhui, 230026, China.

<sup>‡</sup>Houjuan Zhu and Yajun Zhang contributed equally to this work.

\*Corresponding author: Tel/Fax: (+86) 86-551-5591812. E-mail: shwang@iim.ac.cn

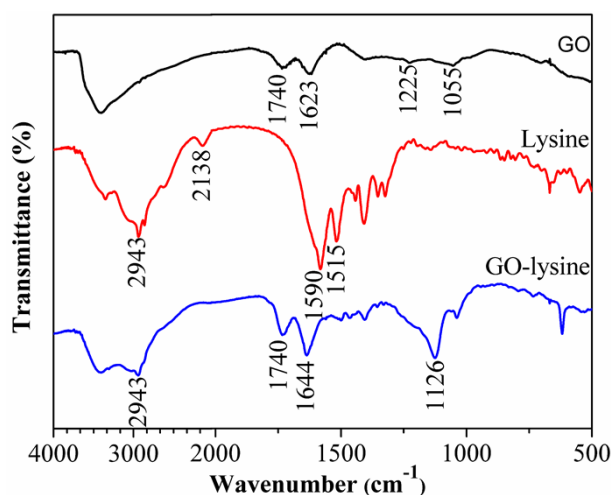

**Fig. S1** FTIR spectra of GO, lysine, photoluminescent GO-lysine.

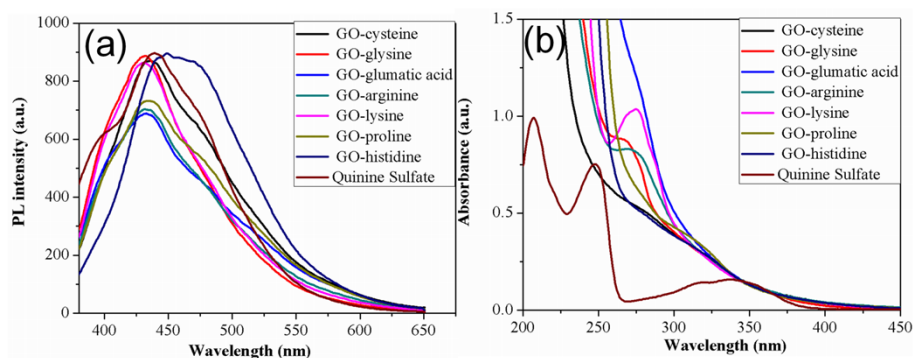

**Fig. S2** (a) Photoluminescence spectra of  $10^{-6}$  M quinine sulfate in 0.1 M  $H_2SO_4$  and GO-AAs in ethanol. The concentrations were respectively  $30 \mu\text{g mL}^{-1}$ ,  $30 \mu\text{g mL}^{-1}$ ,  $35 \mu\text{g mL}^{-1}$ ,  $45 \mu\text{g mL}^{-1}$ ,  $80 \mu\text{g mL}^{-1}$ ,  $70 \mu\text{g mL}^{-1}$ ,  $90 \mu\text{g mL}^{-1}$ . (b) UV-vis absorption of  $10^{-5}$  M quinine sulfate in 0.1 M  $H_2SO_4$  and GO-AAs in ethanol ( $90 \mu\text{g mL}^{-1}$  of GO-histidine,  $120 \mu\text{g mL}^{-1}$  of GO-glycine,  $105 \mu\text{g mL}^{-1}$  of GO-lysine,  $135 \mu\text{g mL}^{-1}$  of GO-arginine,  $80 \mu\text{g mL}^{-1}$  of GO-cysteine,  $70 \mu\text{g mL}^{-1}$  of GO-proline,  $90 \mu\text{g mL}^{-1}$  of GO-glutamic acid).

**Table S1.** The photoluminescent quantum yield calculation of GO modified by amino acids in ethanol based on the standard.

| Sample           | A      | $F_{350}$ | $\eta$ | $\Phi$ (%) |
|------------------|--------|-----------|--------|------------|
| quinine sulfate  | 98352  | 0.0319    | 1.333  | 54         |
| GO-histidine     | 105982 | 0.09566   | 1.366  | 21         |
| GO-glycine       | 87049  | 0.07583   | 1.366  | 21         |
| GO-lysine        | 87951  | 0.09496   | 1.366  | 17         |
| GO-arginine      | 78125  | 0.1005    | 1.366  | 14         |
| GO-cysteine      | 98159  | 0.2621    | 1.366  | 6.9        |
| GO-proline       | 86716  | 0.127     | 1.366  | 6.3        |
| GO-glutamic acid | 83108  | 0.2655    | 1.366  | 5.6        |

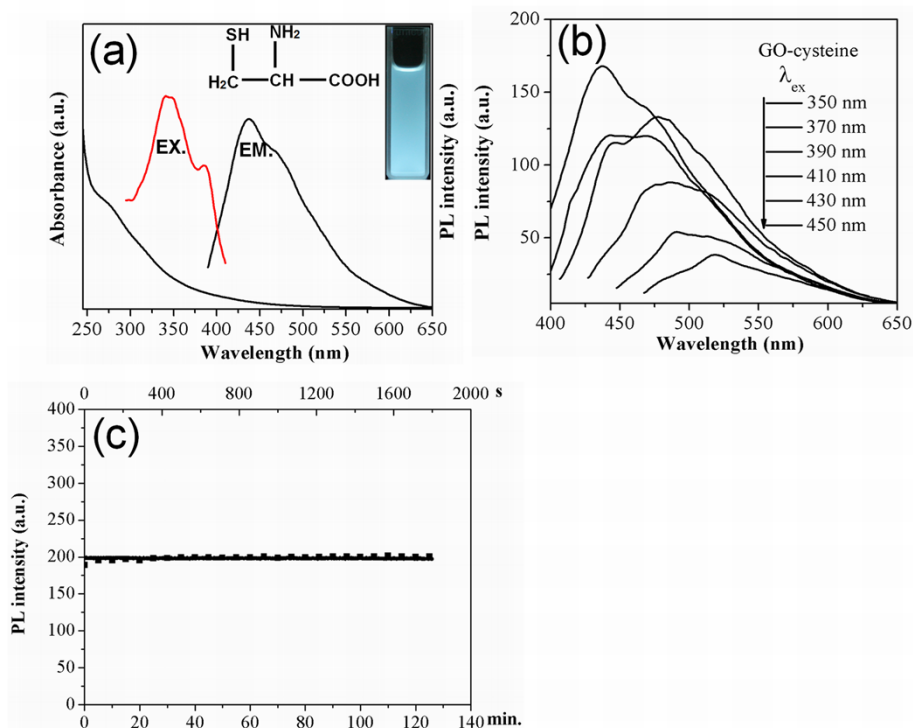

**Fig. S3** (a) UV-vis absorption and photoluminescence emission spectra of GO-cysteine in ethanol. The emission spectrum is obtained under excitation at 350 nm, the photograph was taken under 350 nm irradiation, and the excitation spectrum is obtained at the maximum emission wavelength of 440 nm. (b) Photoluminescence emission spectra of GO-cysteine in ethanol are monitored for progressively longer excitation wavelengths from 350 to 450 nm in 20 nm increments. (c) The photostability of GO-cysteine in ethanol. The line represents: the photoluminescence intensity of GO-cysteine ( $20 \mu\text{g mL}^{-1}$ ) versus the consecutive illumination time under UV light within 30 minutes. The dots represent: the photoluminescence intensity of GO-cysteine ( $20 \mu\text{g mL}^{-1}$ ) versus the pulse illumination of UV light at 365 nm. Each pulse duration is 30 seconds and the interval between two continuous pulses is 5 minutes.

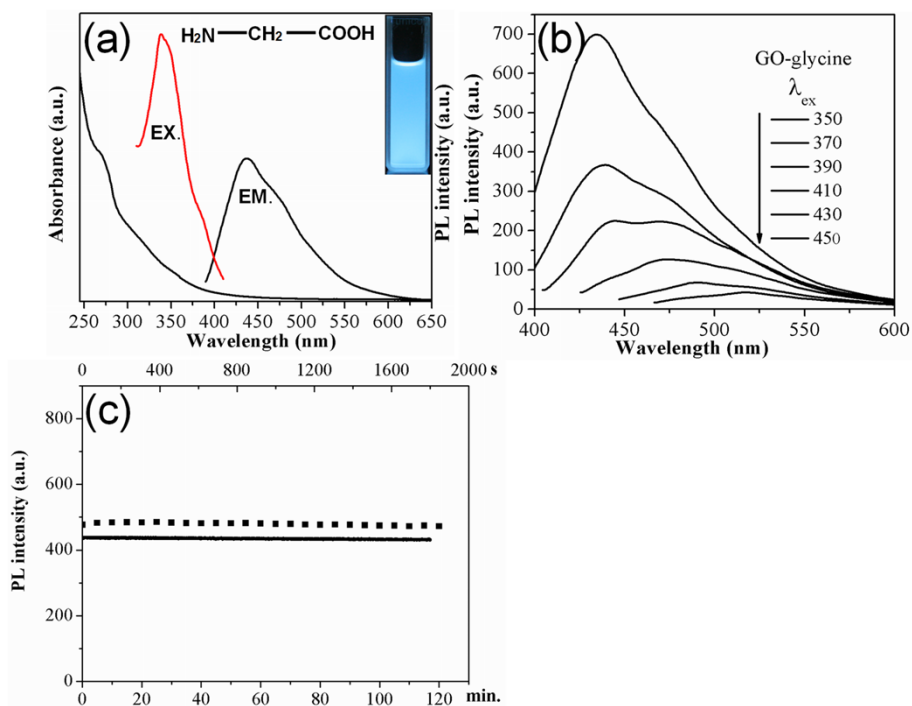

**Fig. S4** (a) UV-vis absorption and photoluminescence spectra of GO-glycine in ethanol. The emission spectrum is obtained under excitation wavelength at 350 nm, the photograph was taken under 350 nm irradiation, and the excitation spectrum is obtained at the maximum emission wavelength of 435 nm. (b) Photoluminescence spectra of GO-glycine in ethanol are monitored for progressively longer excitation wavelengths from 350 to 450 nm in 20 nm increments. (c) The photostability of GO-glycine in ethanol. The line represents: the photoluminescence intensity of GO-glycine ( $15 \mu\text{g mL}^{-1}$ ) versus the consecutive illumination time under UV light within 30 minutes. The dots represent: the photoluminescence intensity of GO-glycine ( $15 \mu\text{g mL}^{-1}$ ) versus the pulse illumination of UV light at 365 nm. Each pulse duration is 30 seconds and the interval between two continuous pulses is 5 minutes.

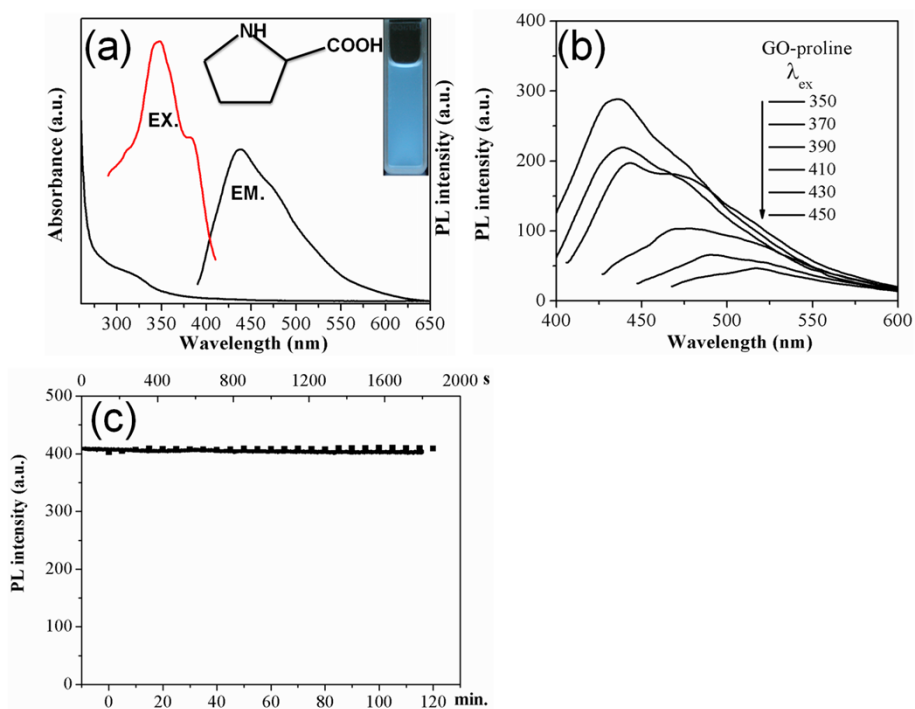

**Fig. S5** (a) UV-vis absorption and photoluminescence spectra of GO-proline in ethanol. The emission spectrum is obtained under excitation wavelength at 350 nm, the photograph is taken under 350 nm irradiation, and the excitation spectrum is obtained at the maximum emission wavelength of 435 nm. (b) Photoluminescence spectra of GO-proline in ethanol are recorded for progressively longer excitation wavelengths from 350 to 450 nm in 20 nm increments. (c) The photostability of GO-proline in ethanol. The line represents: the photoluminescence intensity of GO-proline ( $65 \mu\text{g mL}^{-1}$ ) versus the consecutive illumination time under UV light within 30 minutes. The dots represent: the photoluminescence intensity of GO-proline ( $65 \mu\text{g mL}^{-1}$ ) versus the pulse illumination of UV light at 365 nm. Each pulse duration is 30 seconds and the interval between two continuous pulses is 5 minutes.

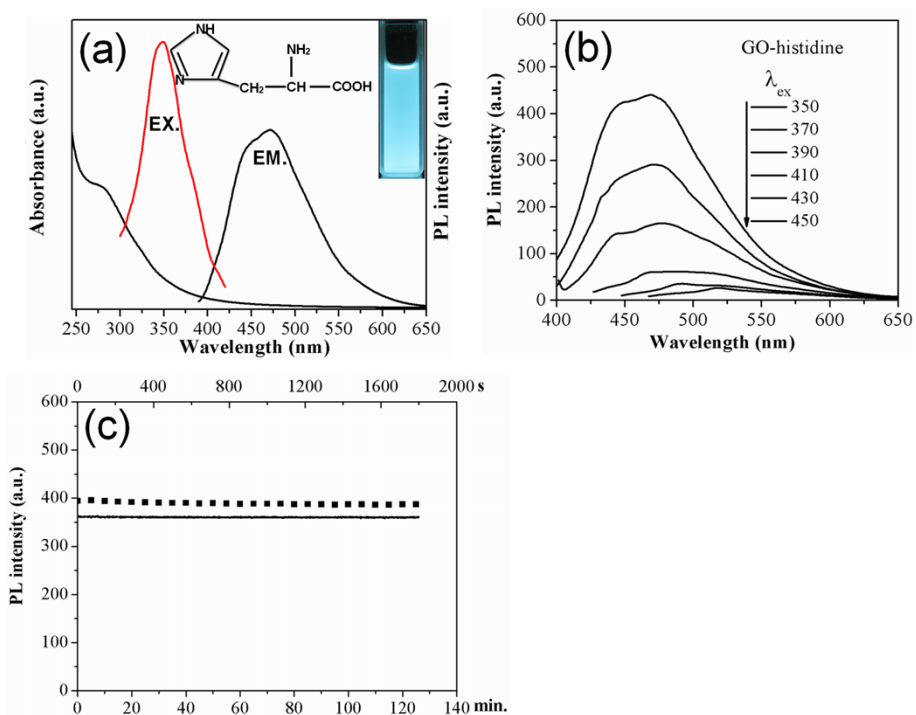

**Fig. S6** (a) UV-vis absorption and photoluminescence spectra of GO-histidine in ethanol. The emission spectrum is obtained under excitation wavelength at 350 nm, the photograph is taken under 350 nm irradiation, and the excitation spectrum is obtained at the maximum emission wavelength of 470 nm. (b) Photoluminescence spectra of GO-histidine in ethanol are monitored for progressively longer excitation wavelengths from 350 to 450 nm in 20 nm increments. (c) The photostability of GO-histidine in ethanol. The line represents: the photoluminescence intensity of GO-histidine ( $10 \mu\text{g mL}^{-1}$ ) versus the consecutive illumination time under UV light within 30 minutes. The dots represent: the photoluminescence intensity of GO-histidine ( $10 \mu\text{g mL}^{-1}$ ) versus the pulse illumination of UV light at 365 nm. Each pulse duration is 30 seconds and the interval between two continuous pulses is 5 minutes.

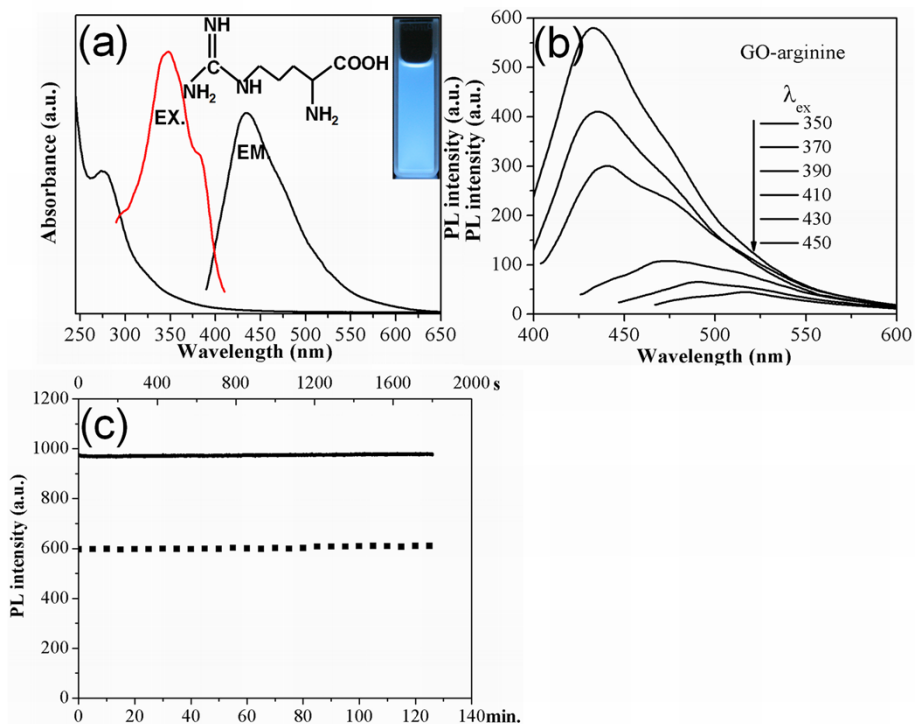

**Fig. S7** (a) UV-vis absorption and photoluminescence spectra of GO-arginine in ethanol. The emission spectrum is obtained under excitation wavelength at 350 nm, the photograph is taken under 350 nm irradiation, and the excitation spectrum is obtained at the maximum emission wavelength of 430 nm. (b) Photoluminescence spectra of GO-arginine in ethanol are monitored for progressively longer excitation wavelengths from 350 to 450 nm in 20 nm increments. (c) The photostability of GO-arginine in ethanol. The line represents: the photoluminescence intensity of GO-arginine ( $50 \mu\text{g mL}^{-1}$ ) versus the consecutive illumination time under UV light within 30 minutes. The dots represent: the photoluminescence intensity of GO-arginine ( $30 \mu\text{g mL}^{-1}$ ) versus the pulse illumination of UV light at 365 nm. Each pulse duration is 30 seconds and the interval between two continuous pulses is 5 minutes.

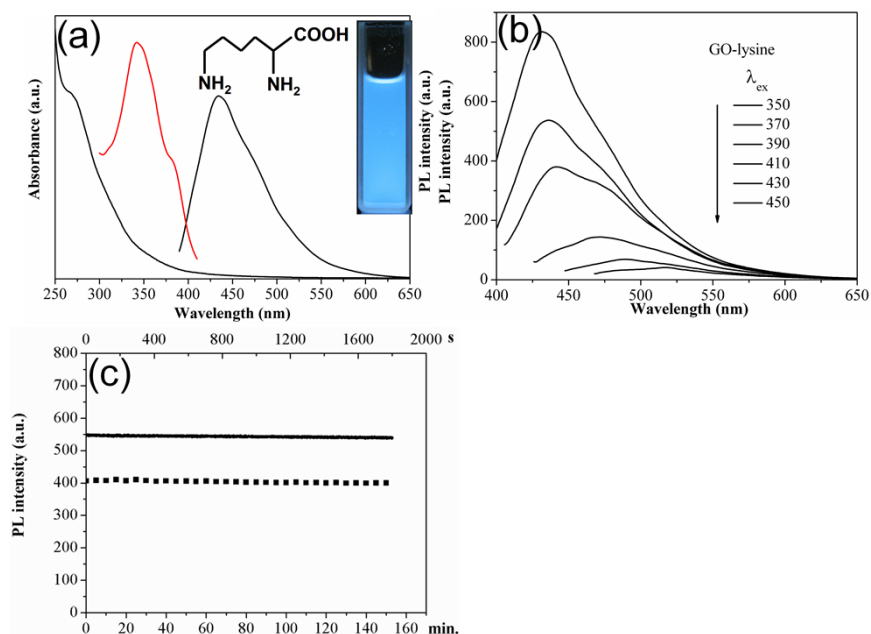

**Fig. S8** (a) UV-vis absorption and photoluminescence spectra of GO-lysine in water. The emission spectrum is obtained under excitation wavelength at 350 nm, the photograph is taken under 350 nm irradiation, and the excitation spectrum is obtained at the maximum emission wavelength of 430 nm. (b) Photoluminescence spectra of GO-lysine in water are monitored for progressively longer excitation wavelengths from 350 to 450 nm in 20 nm increments. (c) The photostability of GO-lysine in water. The line represents: the photoluminescence intensity of GO-lysine ( $25 \mu\text{g mL}^{-1}$ ) versus the consecutive illumination time under UV light within 30 minutes. The dots represent: the photoluminescence intensity of GO-lysine ( $15 \mu\text{g mL}^{-1}$ ) versus the pulse illumination of UV light at 365 nm. Each pulse duration is 30 seconds and the interval between two continuous pulses is 5 minutes.



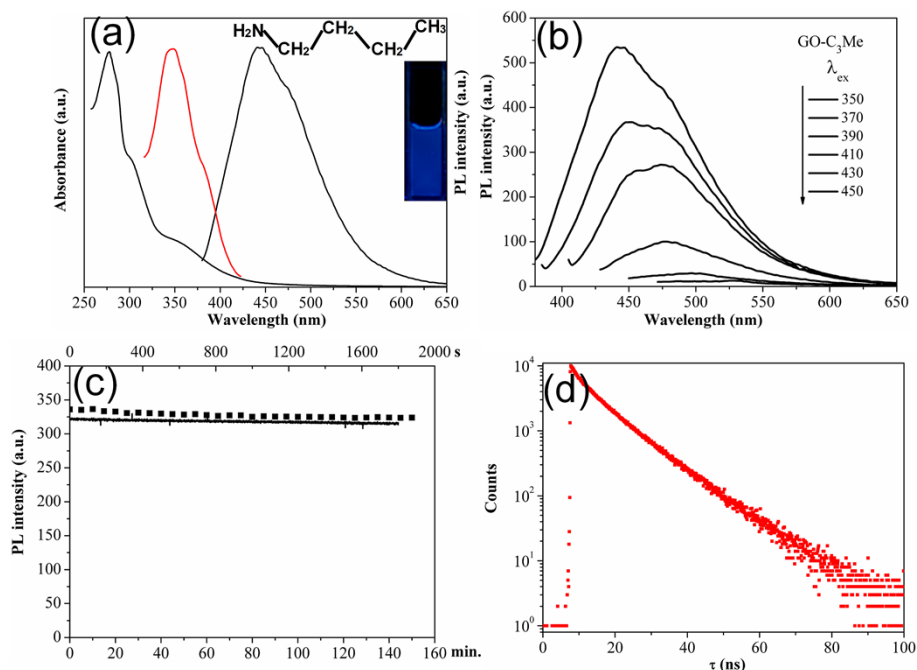

**Fig. S9** (a) UV-vis absorption and photoluminescence spectra of GO-C<sub>3</sub>Me in water. The emission spectrum is obtained under excitation wavelength at 350 nm, the photograph is taken under 350 nm irradiation, and the excitation spectrum is obtained at the maximum emission wavelength of 440 nm. (b) Photoluminescence spectra of GO-C<sub>3</sub>Me in water are monitored for progressively longer excitation wavelengths from 350 to 450 nm in 20 nm increments. (c) The photostability of GO-C<sub>3</sub>Me in water. The line represents: the photoluminescence intensity of GO-C<sub>3</sub>Me (6.03 μg mL<sup>-1</sup>) versus the consecutive illumination time under UV light within 30 minutes. The dots represent: the photoluminescence intensity of GO-C<sub>3</sub>Me (6.03 μg mL<sup>-1</sup>) versus the pulse illumination of UV light at 365 nm. Each pulse duration is 30 seconds and the interval between two continuous pulses is 5 minutes. (d) Fluorescence decay traces of GO-C<sub>3</sub>Me, PL decay curve was measured at an emission wavelength of 375nm. The fluorescence lifetime was measured to be 9.04 ns.

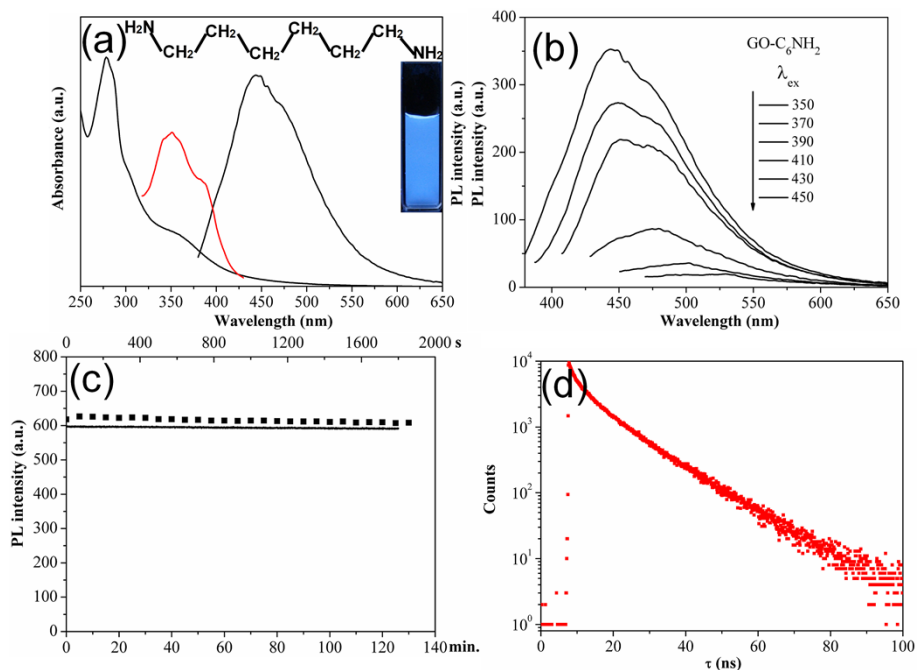

**Fig. S10** (a) UV-vis absorption and photoluminescence spectra of GO-C<sub>6</sub>NH<sub>2</sub> in water. The emission spectrum is obtained under excitation wavelength at 350 nm, the photograph is taken under 350 nm irradiation, and the excitation spectrum is obtained at the maximum emission wavelength of 440 nm. (b) Photoluminescence spectra of GO-C<sub>6</sub>NH<sub>2</sub> in water are monitored for progressively longer excitation wavelengths from 350 to 450 nm in 20 nm increments. (c) The photostability of GO-C<sub>6</sub>NH<sub>2</sub> in water. The line represents: the photoluminescence intensity of GO-C<sub>6</sub>NH<sub>2</sub> (7.75 μg mL<sup>-1</sup>) versus the consecutive illumination time under UV light within 30 minutes. The dots represent: the photoluminescence intensity of GO-C<sub>6</sub>NH<sub>2</sub> (7.75 μg mL<sup>-1</sup>) versus the pulse illumination of UV light at 365 nm. Each pulse duration is 30 seconds and the interval between two continuous pulses is 5 minutes. (d) Fluorescence decay traces of GO-C<sub>6</sub>NH<sub>2</sub>, PL decay curve was measured at an emission wavelength of 375nm. The fluorescence lifetime was measured to be 9.90 ns.

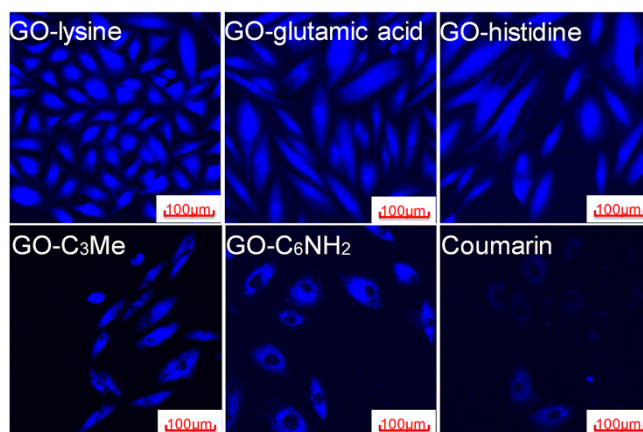

**Fig. S11** Fluorescence images of A549 cells for the cellular internalization of GO-lysine, GO-glutamic acid, GO-histidine, GO-C<sub>3</sub>Me, GO-C<sub>6</sub>NH<sub>2</sub>, Coumarin for 24 h, respectively. The A549 cells were first incubated with these probes, and the fluorescence images were obtained after washing with PBS three times. The scale is 100 μm.

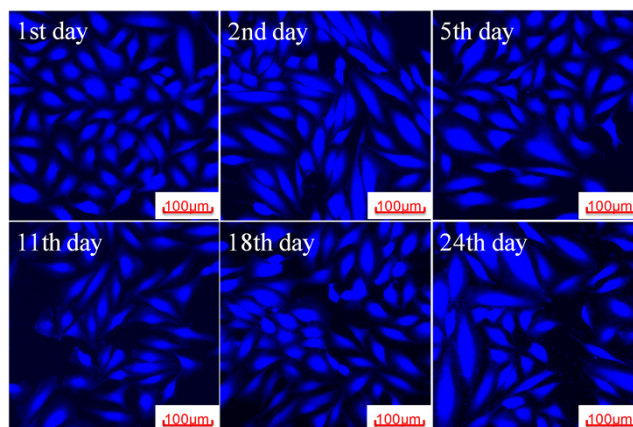

**Fig. S12** Cellular internalization and the time response of GO-lysine by intracellular. The A549 cells were first stained with blue photoluminescent GO-lysine after incubation 24 hours. Then, these cells were continued to be respectively incubated for several days, after washing with PBS three times. The scale is 100  $\mu\text{m}$ .

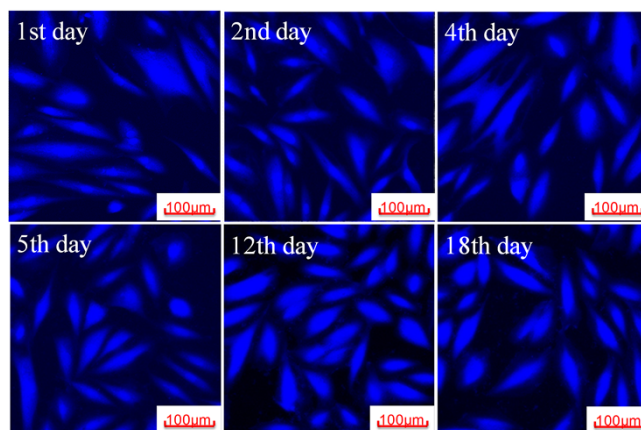

**Fig. S13** Cellular internalization and the time response of GO-histidine by intracellular. The A549 cells were first stained with blue photoluminescent GO-histidine after incubation 24 hours. Then, these cells were continued to be respectively incubated for several days, after washing with PBS three times. The scale is 100  $\mu\text{m}$ .
